# Supplementary material
Source: PubMed Central journal article supplement (PMC6139063)
Supplement: NIHMS980073-supplement-Supplemental_Tables_S1-S4_and_Supplemental_Figures_S1_and_S2.pdf [file NIHMS980073-supplement-Supplemental_Tables_S1-S4_and_Supplemental_Figures_S1_and_S2.pdf]

# Clinical Presentation of a Complex Neurodevelopmental Disorder Caused by Mutations in *ADNP*

## *Supplemental Information*

### Supplemental Tables

**Table S1. Parameters used for statistical analyses**

|                                                |
|------------------------------------------------|
| <b>Epidemiology</b>                            |
| Country of lab                                 |
| Country of Origin                              |
| Gender                                         |
| Age (months) - last observation                |
| Age father (years) - at time of birth          |
| Age mother (years) - at time of birth          |
| Part of twin                                   |
| <b>Growth</b>                                  |
| At birth: duration gestation (weeks)           |
| Weight, g                                      |
| Weight, SD                                     |
| Length, cm                                     |
| Length, SD                                     |
| OFC, cm                                        |
| OFC, SD                                        |
| Post-natal - age last measurements (yr)        |
| Weight, SD                                     |
| Height, SD                                     |
| OFC, SD                                        |
| BMI                                            |
| Short stature (< -2SD)                         |
| <b>Development</b>                             |
| Delay/ ID : severe; moderate; mild             |
| Motor delay                                    |
| Sitting (months)                               |
| Walking independently                          |
| Walking independently from the age of (months) |
| Speech delay                                   |
| No speech (nonverbal child)                    |
| Speech - first words (months)                  |
| Loss of skills                                 |
| <b>Autism</b>                                  |
| <b>ADHD</b>                                    |
| <b>Behavioral problems</b>                     |
| Mood disorder                                  |

|                                               |
|-----------------------------------------------|
| Aggressive behavior                           |
| Self-injurious behavior                       |
| Temper tantrums                               |
| Obsessive compulsive behavior                 |
| Social behavior                               |
| Asocial behavior (reserved, avoids people)    |
| Friendly behavior                             |
| <b>Feeding problems</b>                       |
| Gastrointestinal problems                     |
| Feeding G-Tube                                |
| GERD or Reflux                                |
| Oral movement difficulties                    |
| Oral drinking liquid problems                 |
| Satiety problems: does not seem to "get full" |
| Aspiration difficulties                       |
| Obesity                                       |
| Frequent vomiting                             |
| Constipation                                  |
| <b>Hypotonia</b>                              |
| <b>Hypertonia</b>                             |
| <b>Seizures</b>                               |
| <b>Ear-Nose-Throat</b>                        |
| Hearing loss                                  |
| Narrow hearing canal                          |
| Hearing tubes                                 |
| Frequent otitis media                         |
| Eye defects                                   |
| Hypermetropia                                 |
| Strabismus                                    |
| Ptosis                                        |
| Hypertelorism                                 |
| CVI                                           |
| Myopia                                        |
| Nystagmus                                     |
| <b>Craniofacial features</b>                  |
| Coarse face                                   |
| High hairline                                 |
| Low hairline                                  |
| Abnormal hair thickness                       |
| Prominent forehead                            |
| Eversion/notch eyelid                         |
| Prominent eyelashes                           |
| Thick eyebrows                                |
| Sagging periorbital skin                      |
| Narrow palpebral fissures                     |
| Upward slant palpebral fissures               |
| Downward slant palpebral fissures             |
| Small chin                                    |

|                                       |
|---------------------------------------|
| Pointed chin                          |
| Wide nasal bridge                     |
| Narrow nasal bridge                   |
| Low nasal bridge                      |
| Upturned nasal tip (anteverted nares) |
| Broad nasal tip                       |
| Broad nasal base                      |
| Short nose                            |
| Broad philtrum                        |
| Long philtrum                         |
| Short philtrum                        |
| Smooth philtrum                       |
| Large mouth                           |
| Thin upper vermillion                 |
| Thick lower vermillion                |
| Drooping lower lip                    |
| Cleft palate / submucous cleft        |
| Widely spaced teeth                   |
| Teeth problems                        |
| Low set or posteriorly rotated ears   |
| Malformed ears                        |
| Small ears                            |
| <b>Trunc and limbs</b>                |
| Thick neck                            |
| Scoliosis                             |
| Widely spaced nipples                 |
| Pectus                                |
| Cryptorchidism (uni/bilateral)        |
| Small genitalia                       |
| Umbilical/inguinal hernia             |
| <b>Hand abnormalities</b>             |
| Single palmar crease                  |
| Thumb abnormalities                   |
| Finger abnormalities                  |
| Broad fingers                         |
| Broad halluces                        |
| Fetal finger pads                     |
| Brachydactyly                         |
| Fetal finger pads                     |
| Hyperlaxity                           |
| Sandal gap                            |
| <b>Nail anomalies</b>                 |
| <b>Feet abnormalities</b>             |
| Toe abnormalities                     |
| Flat feet                             |
| <b>Cardiac abnormalities</b>          |
| Cardiac                               |

|                                                      |
|------------------------------------------------------|
| Atrial Septal Defect                                 |
| Mitral Valve Prolapse                                |
| Ventricular Septal Defect                            |
| Patent Foramen Ovale at birth                        |
| Patent Ductus Arteriosus at birth                    |
| Tetralogy of Fallot                                  |
| Other cardiac defect                                 |
| <b>Neuroradiology</b>                                |
| MRI brain abnormality                                |
| Delayed myelination                                  |
| Wide ventricles                                      |
| Callosal body underdevelopment                       |
| Cerebral atrophy                                     |
| White matter lesions                                 |
| Cortical dysplasia                                   |
| Other MRI brain abnormalities                        |
| Brain abnormalities including seizures               |
| <b>Therapy</b>                                       |
| Speech therapy                                       |
| Physical therapy                                     |
| Opposite effects of medication                       |
| Antiepileptic therapy                                |
| <b>Other</b>                                         |
| Renal anomalies                                      |
| Dentition (normal; delayed prim / delayed permanent) |
| Early teeth                                          |
| Early puberty                                        |
| Frequent infections                                  |
| Sleep problems                                       |
| Obstructive Sleep Apnea Syndrome                     |
| Bladder training delay                               |
| Hormonal deficiencies                                |
| Insensitivity to pain                                |
| Sensory Processing Disorder                          |
| Growth hormone deficiency                            |
| Thyroid hormone problems                             |
| Orthopedic and muscular system abnormalities         |
| Skull abnormalities                                  |
| Hip problems                                         |

**Table S2. List of mutations identified in the reported individuals (NM\_015339.2 (hg19))**

| <b>cDNA</b>           | <b>Protein</b>   | <b>gDNA</b>                   | <b>CADD score*</b> | <b>Patient ID</b> | <b>Frequency</b> |
|-----------------------|------------------|-------------------------------|--------------------|-------------------|------------------|
| c.1A>G                | p.Met1?          | g.49520533T>C                 | 24.6               | 48                | 1                |
| c.118C>T              | p.Gln40*         | g.49518637G>A                 | 37                 | 11                | 1                |
| c.190dupA             | p.Thr64Asnfs*35  | g.49518565insT                | 34                 | 64                | 1                |
| c.339delC             | p.Phe114Serfs*47 | g.49510912delG                | 21.2               | 21                | 1                |
| c.372_373delGT        | p.Ile125*        | g.49510878_49510879delAC      | 33                 | 54                | 1                |
| c.484C>T              | p.Gln162*        | g.49510767G>A                 | 36                 | 47                | 1                |
| c.517C>T              | p.Arg173*        | g.49510734G>A                 | 36                 | 17                | 1                |
| c.539_542delTTAG      | p.Val180Glyfs*17 | g.49510709_49510712delCTAA    | 34                 | 28, 39            | 2                |
| c.646 C>T             | p.Arg216*        | g.49510605G>A                 | 36                 | 20                | 1                |
| c.651_655delAGAGA     | p.Glu218*        | g.49510596_49510600delTCTCT   | 29                 | 68                | 1                |
| c.673C>T              | p.Arg225*        | g.49510578G>A                 | 35                 | 42, 66            | 2                |
| c.790C>T              | p.Arg264*        | g.49510461G>A                 | 36                 | 73                | 1                |
| c.819delC             | p.Lys274Asnfs*31 | g.49510432delG                | 25.2               | 62                | 1                |
| c.1026_1027insT       | p.Val343Cysfs*56 | g.49510224_49510225insA       | 33                 | 23                | 1                |
| c.1033C>T             | p.Gln345*        | g.49510218G>A                 | 37                 | 65                | 1                |
| c.1046_1047delTG      | p.Leu349Argfs*49 | g.49510204_49510205delCA      | 32                 | 13                | 1                |
| c.1102C>T             | p.Gln368*        | g.49510149G>A                 | 37                 | 80                | 1                |
| c.1134T>G             | p.Tyr378*        | g.49510117A>C                 | 23.5               | 50                | 1                |
| c.1184_1190delAGTCTGC | p.Gln395Leufs*11 | g.49510061_49510067delGCAGACT | 34                 | 60                | 1                |
| c.1211C>A             | p.Ser404*        | g.49510040G>T                 | 37                 | 2                 | 1                |
| c.1216delC            | p.Gln406Serfs*2  | g.49510035delG                | 33                 | 59                | 1                |
| c.1222_1223delAA      | p.Lys408Valfs*31 | g.49510028_49510029delTT      | 32                 | 3                 | 1                |
| c.1235delT            | p.Leu412Profs*10 | g.49510016delA                | 31                 | 52                | 1                |
| c.1754dupA            | p.Asn585Lysfs*2  | g.49509497dupT                | 26.5               | 75                | 1                |
| c.1930C>T             | p.Arg644*        | g.49509321G>A                 | 37                 | 9                 | 1                |

| cDNA                        | Protein          | gDNA                                | CADD score* | Patient ID                            | Frequency |
|-----------------------------|------------------|-------------------------------------|-------------|---------------------------------------|-----------|
| c.2089C>T                   | p.Gln697*        | g.49509162G>A                       | 39          | 36                                    | 1         |
| c.2129delC                  | p.Pro710Glnfs*6  | g.49509122del                       | 35          | 41                                    | 1         |
| c.2129dupC                  | p.Ser711Lysfs*24 | g.49509122dupG                      | 34          | 29                                    | 1         |
| c.2153_2165delCTTACGAGCAAAT | p.Thr718Argfs*6  | g.49509086_49509098delATTTGCTCGTAAG | 35          | 4                                     | 1         |
| c.2156dup                   | p.Tyr719*        | g.49509095dupT                      | 32          | 5, 10, 27, 38, 44, 55, 70, 79         | 8         |
| c.2157C>A                   | p.Tyr719*        | g.49509094G>T                       | 22.9        | 57, 58, 63                            | 3         |
| c.2157C>G                   | p.Tyr719*        | g.49509094G>C                       | 21.9        | 12, 16, 26, 34, 49, 56,               | 6         |
| c.2188C>T                   | p.Arg730*        | g.49509063G>A                       | 36          | 18, 25, 45, 69, 74                    | 5         |
| c.2206dupA                  | p.Ser736Lysfs*2  | g.49509045dupT                      | 28.4        | 51                                    | 1         |
| c.2213C>G                   | p.Ser738*        | g.49509038G>C                       | 43          | 71                                    | 1         |
| c.2251delGinsTAAA           | p.Val751*        | g.49509000delCinsTTTA               | 38          | 31                                    | 1         |
| c.2268_2269insT             | p.Lys757*        | g.49508982_49508983insA             | 35          | 53                                    | 1         |
| c.2287delT                  | p.Ser763Profs*9  | g.49508964delA                      | 35          | 46                                    | 1         |
| c.2310delT                  | p.Leu771*        | g.49508941delA                      | 32          | 33                                    | 1         |
| c.2491_2494delTTAA          | p.Leu831Ilefs*82 | g.49508757_49508760delTTAA          | 35          | 6, 8, 15, 78                          | 4         |
| c.2495_2499delATAAA         | p.Asn832Serfs*4  | g.49508752_49508756delTTTAT         | 35          | 61                                    | 1         |
| c.2496_2499delTAAA          | p.Asn832Lysfs*81 | g.49508752_49508755delTTTA          | 35          | 1, 14, 19, 24, 30, 32, 35, 40, 67, 72 | 10        |
| c.2808delC                  | p.Tyr936*        | g.49508443delG                      | 16.42       | 7                                     | 1         |
| c.3047dupA                  | p.Ala1017Glyfs*6 | g.49508204dupT                      | 35          | 37                                    | 1         |
| c.3069_3072delAGAG          | p.Arg1023Serfs*3 | g.49508179_49508182delCTCT          | 35          | 43                                    | 1         |
| c.3170T>A                   | p.Leu1057*       | g.49508081A>T                       | 47          | 22                                    | 1         |

\* CADD score is Phred-scaled

**Table S3. Growth in individuals with Helsmoortel-Van der Aa syndrome**

| <b>Growth</b>              |             |          |                     |          |                            |          |              |                            |          |              |                           |          |              |
|----------------------------|-------------|----------|---------------------|----------|----------------------------|----------|--------------|----------------------------|----------|--------------|---------------------------|----------|--------------|
|                            | <b>Mean</b> |          | <b>Mean z-score</b> |          | <b>z-score &lt; -2 (%)</b> |          |              | <b>z-score &gt; +2 (%)</b> |          |              | <b>Number of patients</b> |          |              |
|                            | <b>F</b>    | <b>M</b> | <b>F</b>            | <b>M</b> | <b>F</b>                   | <b>M</b> | <b>Total</b> | <b>F</b>                   | <b>M</b> | <b>Total</b> | <b>F</b>                  | <b>M</b> | <b>Total</b> |
| Birth weight (g)           | 2965.8      | 3155.5   | -0.3                | 0.4      | 10.0%                      | 6.1%     | 7.9%         | 0.0%                       | 9.1%     | 4.8%         | 30                        | 33       | 63           |
| Birth length (cm)          | 48.9        | 49.5     | -0.2                | 0.3      | 12.5%                      | 0.0%     | 6.3%         | 0.0%                       | 0.0%     | 0.0%         | 24                        | 24       | 48           |
| Birth OFC (cm)             | 34.7        | 34.5     | 0.5                 | 0.1      | 12.5%                      | 0.0%     | 6.5%         | 0.0%                       | 0.0%     | 0.0%         | 16                        | 15       | 31           |
| Weight at last observation | NA          | NA       | 0.4                 | 0.7      | 0.0%                       | 5.9%     | 3.2%         | 10.3%                      | 5.9%     | 7.9%         | 29                        | 34       | 63           |
| Length at last observation | NA          | NA       | -0.4                | -0.8     | 22.6%                      | 23.7%    | 23.2%        | 0.0%                       | 2.6%     | 1.4%         | 31                        | 38       | 69           |
| OFC at last observation    | NA          | NA       | -0.4                | -0.3     | 10.7%                      | 5.9%     | 8.1%         | 0.0%                       | 0.0%     | 0.0%         | 28                        | 34       | 62           |

Growth parameters at birth and at last observation. OFC = Occipital Frontal Circumference; F = Female; M = Male

**Table S4. Facial features of the reported individuals with mutation in the *ADNP* gene**

| <b>Facial feature</b>               | <b>Frequency</b> | <b>Total</b> |
|-------------------------------------|------------------|--------------|
| Thin upper vermillion               | 70.3%            | 45/64        |
| Prominent forehead                  | 65.6%            | 42/64        |
| Wide nasal bridge                   | 50.0%            | 33/66        |
| High hairline                       | 50.0%            | 33/66        |
| Short nose                          | 49.2%            | 31/63        |
| Malformed ears                      | 48.5%            | 32/66        |
| Upturned nasal tip                  | 46.7%            | 28/60        |
| Everted lower lip                   | 45.5%            | 25/55        |
| Long philtrum                       | 39.3%            | 22/56        |
| Thick lower vermillion              | 36.4%            | 20/55        |
| Downward slant palpebral fissures   | 33.3%            | 20/60        |
| Widely spaced teeth                 | 34.6%            | 18/52        |
| Broad nasal base                    | 29.6%            | 16/54        |
| Broad nasal tip                     | 26.3%            | 15/57        |
| Teeth problems                      | 24.5%            | 13/53        |
| Narrow palpebral fissures           | 24.1%            | 14/58        |
| Large mouth                         | 23.2%            | 13/56        |
| Low nasal bridge                    | 20.6%            | 13/63        |
| Eversion/notch eyelid               | 19.0%            | 12/63        |
| thick eyebrows                      | 18.3%            | 11/60        |
| Coarse face                         | 16.9%            | 11/65        |
| Prominent eyelashes                 | 16.7%            | 10/60        |
| Broad philtrum                      | 16.1%            | 9/56         |
| Low-set or posteriorly rotated ears | 14.7%            | 10/68        |
| Abnormal hair thickness             | 14.0%            | 8/57         |
| Sagging periorbital skin            | 13.6%            | 8/59         |
| Small ears                          | 11.6%            | 8/69         |
| Thick alae nasi                     | 11.3%            | 6/53         |



### Supplemental Figures

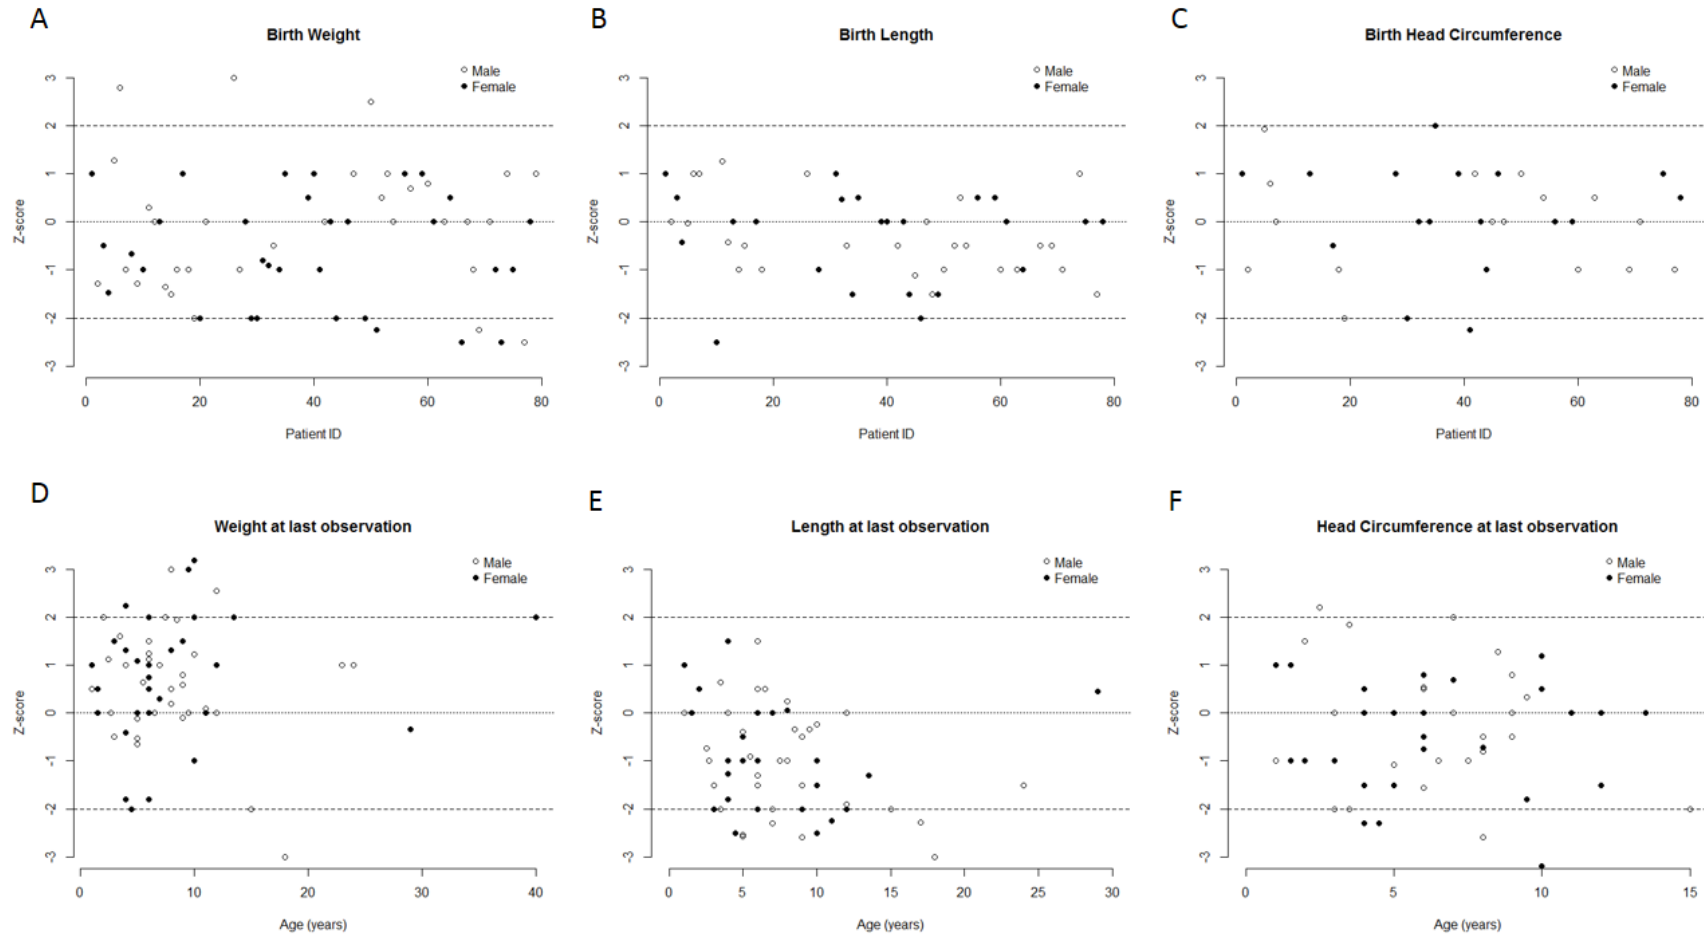

**Figure S1. Growth in individuals with Helsmoortel-Van der Aa syndrome**

Growth z-scores for height, weight and head circumference in male and female individuals at birth (A-C) and at last observation (D-F).

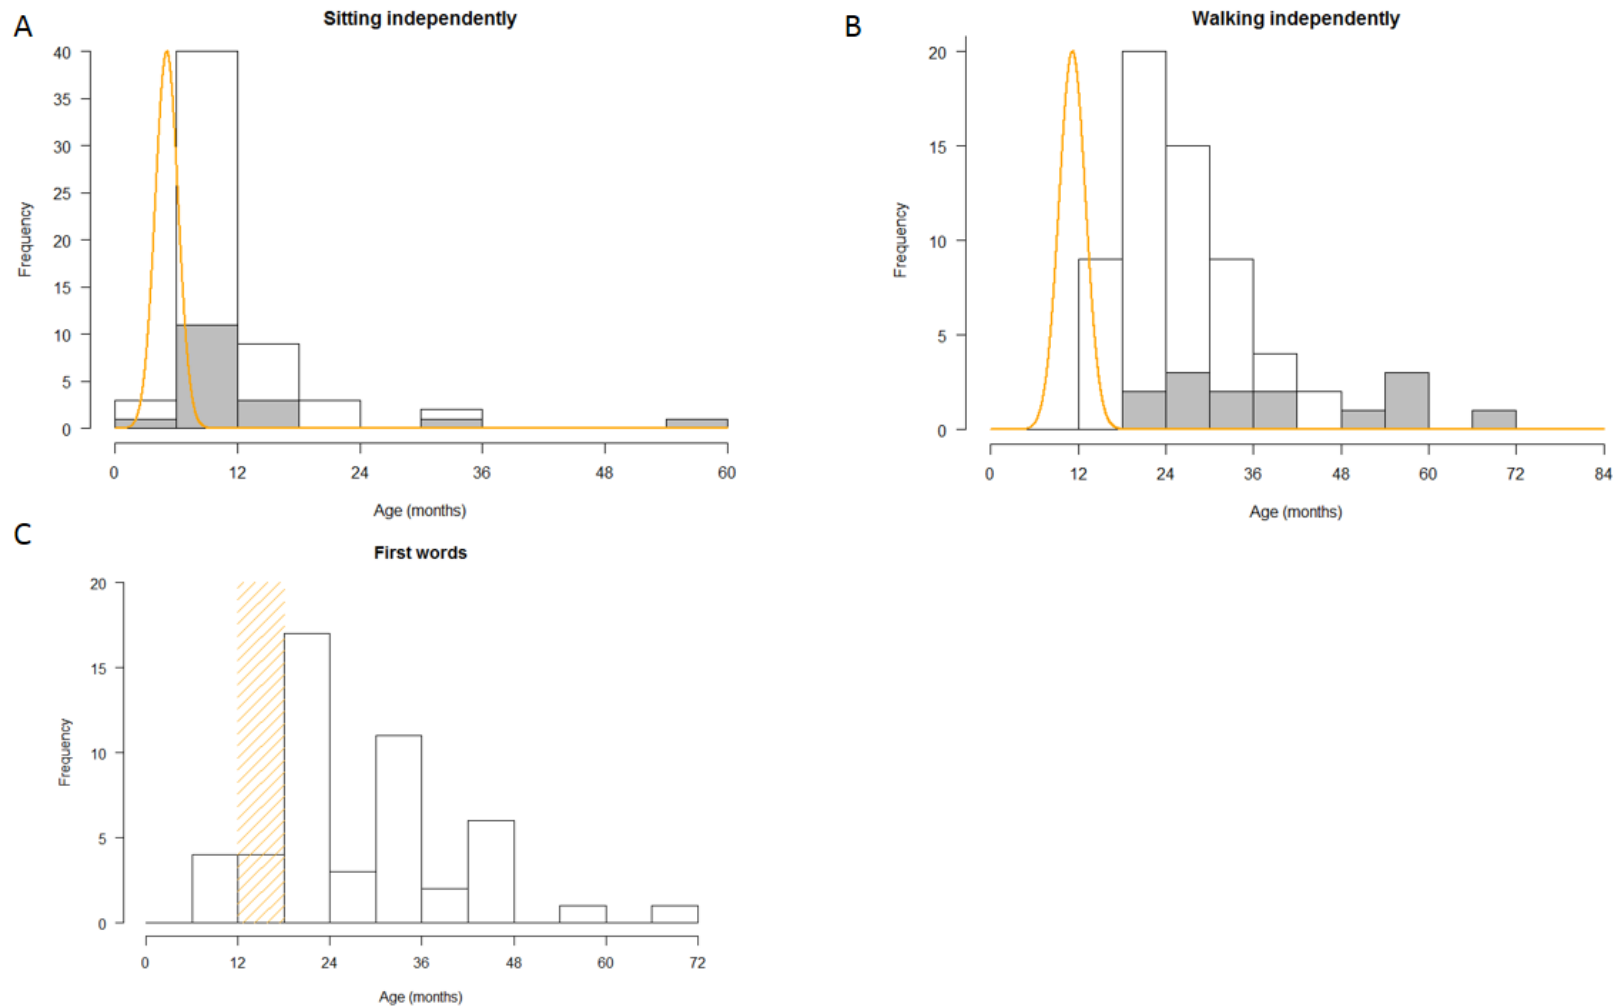

**Figure S2. Developmental milestones**

(A) Sitting independently. In orange: WHO reference cohort<sup>1</sup>. Grey area: Individuals with p.Tyr719\* mutation; (B) Walking independently. In orange: WHO reference cohort<sup>1</sup>. Grey area: Individuals with p.Tyr719\* mutation; (C) First words. Shaded area: Typically developing children.

<sup>1</sup>The WHO Child Growth Standards. 2017. <http://www.who.int/childgrowth/>.
